# Supplementary material for: Exogenous GA3 Application Enhances Xylem Development and Induces the Expression of Secondary Wall Biosynthesis Related Genes in Betula platyphylla
Source: PubMed Central journal article supplement (PMC4613346; doi:10.3390/ijms160922960), 2015-09-23
Supplement: ijms-16-22960-s001.pdf [file ijms-16-22960-s001.pdf]

## Supplementary Information

**Table S1.** Primers used in RT-PCR analysis.

| <b>Gene Name</b>  | <b>Primer Sequence (5'-3')</b>                                               | <b>Amplicon Sizes (bp)</b> |
|-------------------|------------------------------------------------------------------------------|----------------------------|
| <i>BplNAC1</i>    | Forward primer: CAAACCCAACCGAGACAATG<br>Reverse primer: TGAGTGGTGCTTGCCCTATT | 158                        |
| <i>BplNAC2</i>    | Forward primer: GATAGGCTTGTGGCTTGTC<br>Reverse primer: CGATTTGCTGTTGTAGTCC   | 175                        |
| <i>BplNAC3</i>    | Forward primer: AGTGGGAACCTTGGGAGTT<br>Reverse primer: TCACATTGTTGGTGCCTCT   | 177                        |
| <i>BplNAC4</i>    | Forward primer: CTGCTGCTGGATTCTGGAAG<br>Reverse primer: TCAGTTGTTTGGAGGCGAT  | 160                        |
| <i>BplMYB4</i>    | Forward primer: CCCGAAGAGGACGAGATGCT<br>Reverse primer: TGGTATGGGCCTTGACGATG | 193                        |
| <i>BplMYB5</i>    | Forward primer: GAACAGTGGTGGGTGAGGAT<br>Reverse primer: TCCGAGGAAATCAATGAAGG | 158                        |
| <i>BplMYB83</i>   | Forward primer: AGCCAATAAGCGAAGTAATC<br>Reverse primer: TCTGTTCTTGAAGCCTCTGT | 181                        |
| <i>BplMYB103</i>  | Forward primer: TGCTTTCCCGGCATCTATGT<br>Reverse primer: TCTGATTTCTTCGCACCCT  | 187                        |
| <i>BplMYB85</i>   | Forward primer: CGATAGGGTTTCTTTGGACT<br>Reverse primer: AGGAGGAGGGTAGCAACAGG | 150                        |
| <i>BplCESA4</i>   | Forward primer: GATTCTTGACCAGTTCCCT<br>Reverse primer: AGTTATGATTGGCGGTTCCCT | 160                        |
| <i>BplCESA7</i>   | Forward primer: CTCCCTGCTATCTGCTTGCT<br>Reverse primer: TTGCTCGTTTCTCCACCATT | 162                        |
| <i>BplPAL3</i>    | Forward primer: TTTCGAGGCCAACATACAAG<br>Reverse primer: TTCACATAAGCACTCCCATC | 177                        |
| <i>BplPAL4</i>    | Forward primer: TTTCAAGCGGATTCCAGTAT<br>Reverse primer: TGCTCCAGTGAGAAGCGTAG | 184                        |
| <i>BplGA20ox1</i> | Forward primer: TTTCCGCTACTCTGCTGATC<br>Reverse primer: TATTCCTGAAATGGGCTCT  | 192                        |
| <i>BplGA20ox3</i> | Forward primer: GGTGCTCTATAATGCGATGC<br>Reverse primer: GTCTGCCATTTGTTGTTTGC | 154                        |
